# Supplementary material
Source: PubMed Central journal article supplement (PMC3676023)
Supplement: IAI.01437-12_zii999090160so1.pdf [file IAI.01437-12_zii999090160so1.pdf]

| <i>C. jejuni</i> strain      | Disease association | Ganglioside mimic |
|------------------------------|---------------------|-------------------|
| GB1                          | GBS                 | none (GA1)        |
| GB2                          | GBS                 | GD1a, GM1a        |
| *GB2 $\Delta$ <i>cst-II</i>  | -                   | GA1, GA2, GA3     |
| GB11                         | GBS                 | GD1a, GM1a        |
| *GB11 $\Delta$ <i>cst-II</i> | -                   | GA1, GA2, GA3     |
| GB13                         | GBS                 | GM1a              |
| GB14                         | GBS                 | GM1a              |
| GB19                         | GBS                 | GD1c              |
| GB26                         | GBS                 | GM1b              |
| GB31                         | GBS                 | GD1a, GM1a        |
| 11168                        | enteritis           | GM1, GM2          |

1

2 **Table S1. *C. jejuni* strains used in this study.** The ganglioside mimicking structures on the surface of  
3 each *C. jejuni* strain were identified by mass spectrometry and have been previously described (11, 16).

4 \* *Campylobacter* sialic acid transferase (*cst-II*) knockout mutants of strains GB2 and GB11.

5

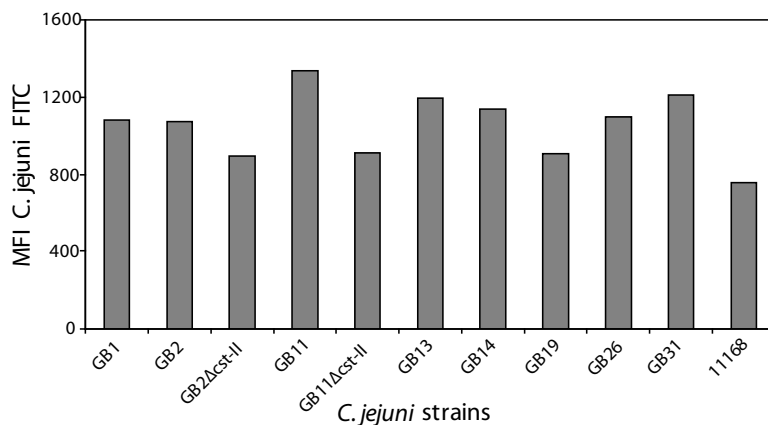

6

7 **Figure S1.** Flow cytometric analysis of FITC-labeled *C. jejuni* strains. In order to determine if *C. jejuni*  
8 strains were labeled adequately, FITC-labeled *C. jejuni* strains were analyzed using flow cytometry.

9

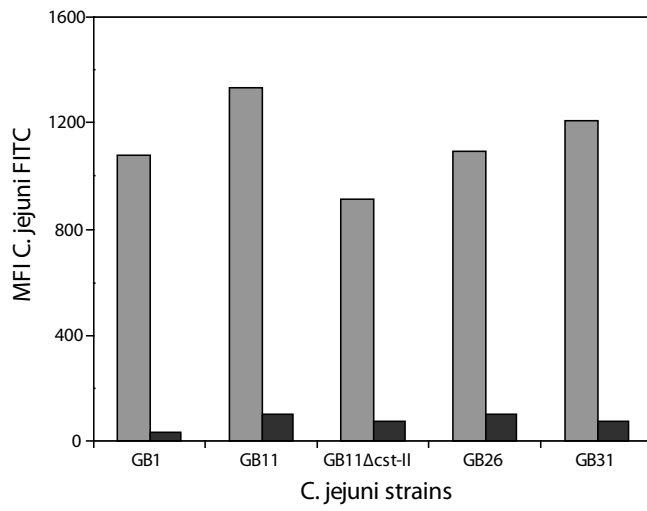

- 1
- 2 **Figure S2.** Quenching efficiency of trypan blue. To assess the quenching efficiency of trypan blue,
- 3 FITC-labeled *C. jejuni* strains were analyzed by flow cytometry before (grey bars) and after (black bars)
- 4 incubation with trypan blue.
